# Supplementary material for: Puromycin labeling does not allow protein synthesis to be measured in energy-starved cells
Source: PubMed Central journal article supplement (PMC5833866; doi:10.1038/s41419-017-0056-x), 2018-01-18

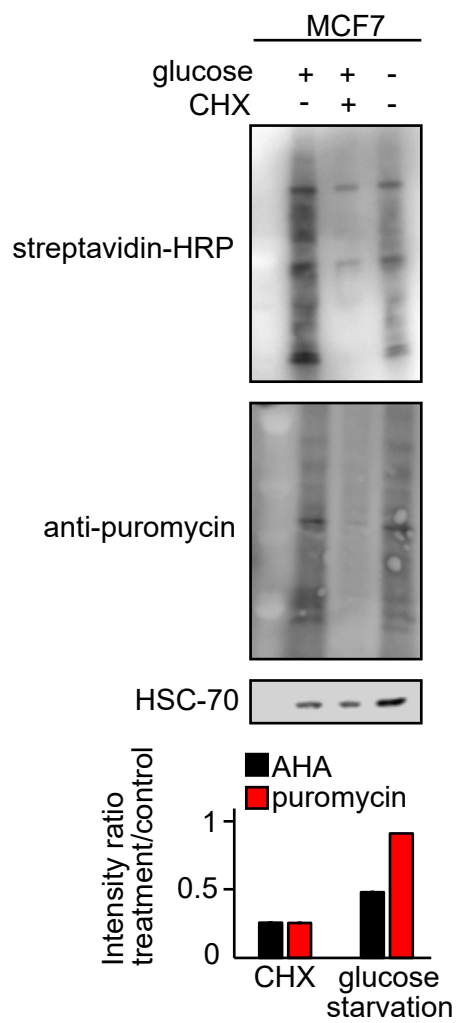

Supplement: 41419_2017_56_MOESM1_ESM.pdf [file 41419_2017_56_MOESM1_ESM.pdf]
